# Supplementary material for: Evolution of Disease Response Genes in Loblolly Pine: Insights from Candidate Genes
Source: PLoS One. 2010 Dec 6;5(12):e14234. doi: 10.1371/journal.pone.0014234 (PMC2997792; doi:10.1371/journal.pone.0014234)
Supplement: Results S1 — Mendelian Segregation Analysis of the loci that displayed shared polymorphisms between species, within FBRC population families that they segregate in. The family sizes are variable between 15 and 18. A Gtest with Williams correction was conducted, and the P-value was calculated according to chi-squared distribution with 1 degree of freedom (threshold for 0.05 significance is 3.84). (0.04 MB XLS) [file pone.0014234.s001.xls]

## Sheet: G-test
	Family-ID
GenotypeClass-lp5	68	35	48	69	3	30	8	13	22	41	12	60	2	54	57	33	29
0	1	2	2	2	3	3	2	4	4	4	4	3	5	5	3	5	2	AA
1	7	3	3	8	5	7	10	4	4	5	6	8	6	7	6	7	8	AB
2	7	10	10	6	7	5	3	7	7	6	5	4	6	5	6	6	6	BB
Family Size	15	15	15	16	15	15	15	15	15	15	15	15	17	17	15	18	16
f(p-obs)	0.3	0.233333	0.233333	0.375	0.366667	0.433333	0.466667	0.4	0.4	0.433333	0.466667	0.466667	0.470588	0.5	0.4	0.472222	0.375
f(q-obs)	0.7	0.766667	0.766667	0.625	0.633333	0.566667	0.533333	0.6	0.6	0.566667	0.533333	0.533333	0.529412	0.5	0.6	0.527778	0.625
p2-exp	1.35	0.816667	0.816667	2.25	2.01667	2.81667	3.26667	2.4	2.4	2.81667	3.26667	3.26667	3.76471	4.25	2.4	4.01389	2.25
2pq-exp	6.3	5.36667	5.36667	7.5	6.96667	7.36667	7.46667	7.2	7.2	7.36667	7.46667	7.46667	8.47059	8.5	7.2	8.97222	7.5
q2-exp	7.35	8.81667	8.81667	6.25	6.01667	4.81667	4.26667	5.4	5.4	4.81667	4.26667	4.26667	4.76471	4.25	5.4	5.01389	6.25
G(df=1)WilliamsCorr	0.185589	2.52769	2.52769	0.0693099	1.14705	0.0359364	1.70992	2.92013	2.92013	1.51623	0.563201	0.074159	1.41859	0.515027	0.401931	0.847955	0.0693099
P	0.666613	0.111864	0.111864	0.792344	0.284168	0.849647	0.190996	0.0874808	0.0874808	0.21819	0.452974	0.785375	0.233635	0.472971	0.526094	0.357132	0.792344
	Family-ID
GenotypeClass-pr4.1	15	37	33	69	21	13	48	55
0	1	1	3	4	4	5	4	1	AA
1	2	9	6	5	7	5	6	6	AB
2	15	5	9	7	7	5	5	8	BB
Family Size	18	15	18	16	18	15	15	15
f(p-obs)	0.111111	0.366667	0.333333	0.40625	0.416667	0.5	0.466667	0.266667						williams correction			1.03333
f(q-obs)	0.888889	0.633333	0.666667	0.59375	0.583333	0.5	0.533333	0.733333						x-sq-0.05[1]			3.841
p2-exp	0.222222	2.01667	2	2.64062	3.125	3.75	3.26667	1.06667
2pq-exp	3.55556	6.96667	8	7.71875	8.75	7.5	7.46667	5.86667
q2-exp	14.2222	6.01667	8	5.64062	6.125	3.75	4.26667	8.06667
G(df=1)WilliamsCorr	2.22971	1.312	1.06519	1.93829	0.697075	1.64418	0.563201	0.00756424
P	0.135379	0.252033	0.302034	0.163855	0.403768	0.199752	0.452974	0.930693
	Family-ID
GenotypeClass-wrky-like-1	40	16	19	0	4
0	3	5	5	5	4	AA
1	8	4	4	5	5	AB
2	6	6	6	7	7	BB
Family Size	17	15	15	17	16
f(p-obs)	0.411765	0.466667	0.466667	0.441176	0.40625
f(q-obs)	0.588235	0.533333	0.533333	0.558824	0.59375
p2-exp	2.88235	3.26667	3.26667	3.30882	2.64062
2pq-exp	8.23529	7.46667	7.46667	8.38235	7.71875
q2-exp	5.88235	4.26667	4.26667	5.30882	5.64062
G(df=1)WilliamsCorr	0.0134158	3.24635	3.24635	2.74171	1.93829
P	0.90779	0.0715827	0.0715827	0.09776	0.163855
